# Supplementary material for: The Degradative Capabilities of New Amycolatopsis Isolates on Polylactic Acid
Source: PubMed Central journal article supplement (PMC6955660; doi:10.3390/microorganisms7120590), 2019-11-20
Supplement: microorganisms-07-00590-s001.pdf [file microorganisms-07-00590-s001.pdf]

**Table S1.** Soil samples used in this work.

| <b>Sample name</b> | <b>Source</b>                     | <b>Sampling site</b>        | <b>Sampling date</b> |
|--------------------|-----------------------------------|-----------------------------|----------------------|
| SCA1               | Agricultural soil                 | Signa (FI)                  | 29/10/2017           |
| SGF1               | Garden soil                       | Carmignano (PO)             | 22/09/2017           |
| SGN1               | Grassland soil in industrial site | Sesto Fiorentino (FI)       | 1/3/2017             |
| SL1                | Forest soil                       | Lentula (PT)                | 1/11/2017            |
| SL2                | Forest soil                       | Lentula (PT)                | 1/11/2017            |
| SL4                | Forest soil                       | Lentula (PT)                | 1/11/2017            |
| SL5                | Forest soil                       | Lentula (PT)                | 1/11/2017            |
| SL6                | Forest soil                       | Lentula (PT)                | 1/11/2017            |
| SNC1               | Grassland soil in city site       | Gambassi (FI)               | 1/11/2017            |
| SO1                | Grassland soil in industrial site | Sesto Fiorentino (FI)       | 29/10/2017           |
| SO2                | Grassland soil in industrial site | Sesto Fiorentino (FI)       | 29/10/2017           |
| SPO1               | Grassland soil in industrial site | Sesto Fiorentino (FI)       | 21/11/2017           |
| SST1               | Graden soil                       | Firenze                     | 15/11/2017           |
| SST2               | Agricultural soil                 | Campi Bisenzio (FI)         | 15/11/2017           |
| STC1               | Agricultural soil                 | Pistoia                     | 18/05/2017           |
| STM1               | Forest soil                       | Castelnuovo Garfagnana (LU) | 2/10/2017            |
| STM2               | Forest soil                       | Castelnuovo Garfagnana (LU) | 2/10/2017            |
| STM3               | Forest soil                       | Castelnuovo Garfagnana (LU) | 2/10/2017            |
| STNT1              | Soil from greenhouse              | Pistoia                     | 18/05/2017           |
| STV1               | Soil from greenhouse              | Pistoia                     | 18/05/2017           |
